# Supplementary material for: Arabidopsis thaliana Sucrose Phosphate Synthase A2 Affects Carbon Partitioning and Drought Response
Source: MDPI journal article supplement (doi:10.3390/biology12050685), 2023-05-06
Supplement: s1 [file s1]

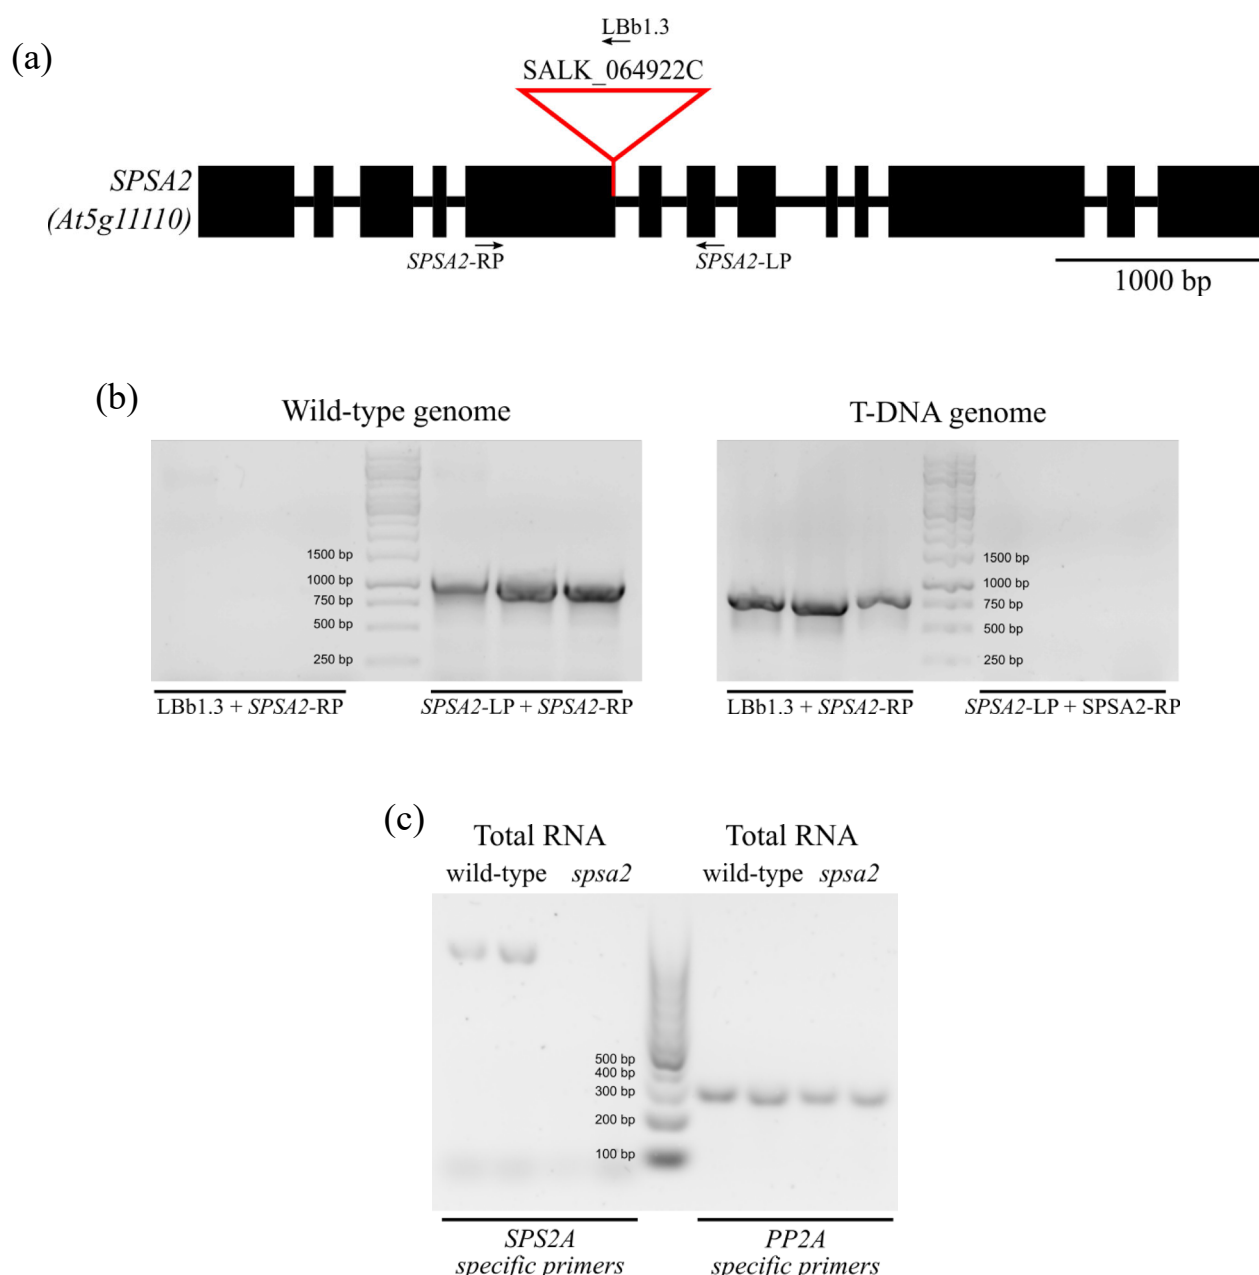

**Figure S1.** T-DNA insertion in the SALK\_064922C homozygous line: **(a)** Gene structure of At5g11110. Primers used to screen the SALK\_064922C line, indicated by arrows, were derived from the SALK T\_DNA primer design web tool (<http://signal.salk.edu/tdnaprimers.2.html>). Black bars: exons; black lines: introns. **(b)** Selection of homozygous line through PCR amplification of wild-type allele using *SPSA2*-LP and *SPSA2*-RP primers, and T-DNA band using LBb1.3 and *SPSA2*-RP primers. Left: genomic DNA from wild-type plants; right: genomic DNA from T-DNA line. The two images are taken from the same agarose gel and cropped for illustration purposes. Three plants for each genotype were analyzed. **(c)** Expression level of *SPSA2* in wild-type and T-DNA plants. Total RNA was extracted from two wild-type and two homozygous (*spsa2*) plants and retrotranscribed, and cDNA was used as template for RT-PCR analysis using *SPSA2*- and *PP2A*-specific primers (see Table S1). Samples were separated in a single agarose gel; the image was cut out for illustration purposes.

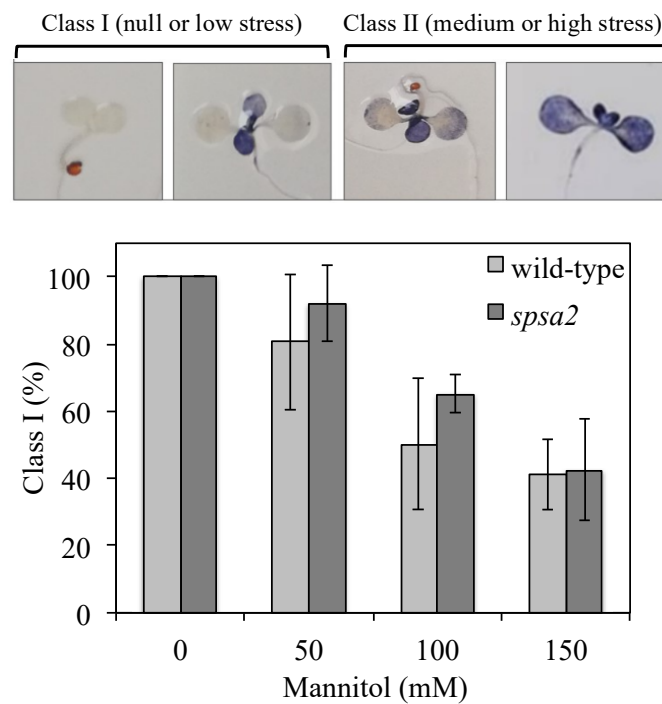

**Figure S2.** NBT-staining for qualitative evaluation of oxidative stress. Upper panel: color scale used to assess the level of stress. ROS content was measured on 2-week-old wild-type and *spsa2* plants exposed to different concentrations of mannitol. Data are means  $\pm$  SDs ( $n=30$  for each genotype and each condition). A t-test was performed, and no significant statistical differences were observed.

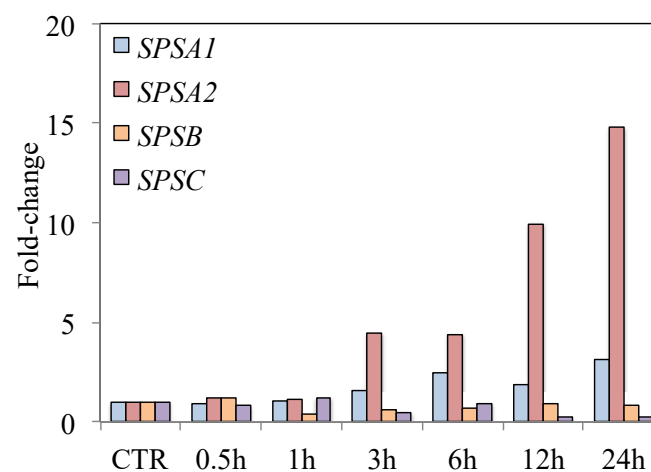

**Figure S3.** Relative expression levels of the four *SPS* genes in response to drought (300 mM mannitol). Data are from eFP Browser [41].

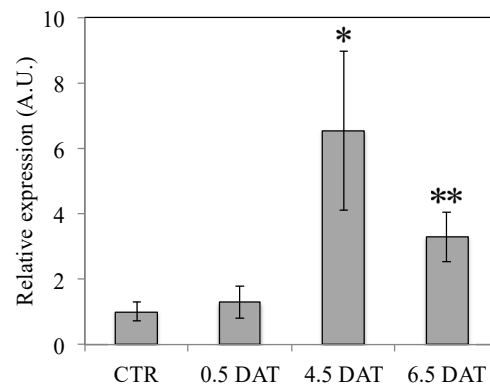

**Figure S4.** Expression profile of *SP5A2* in response to drought. Expression levels of *SP5A2* in wild-type plants exposed to 150 mM mannitol were analyzed using qPCR. Three independent biological samples were analyzed. Values are reported as means  $\pm$  SDs. The t-test was used for statistics: \*  $p < 0.05$ ; \*\*  $p < 0.01$ .

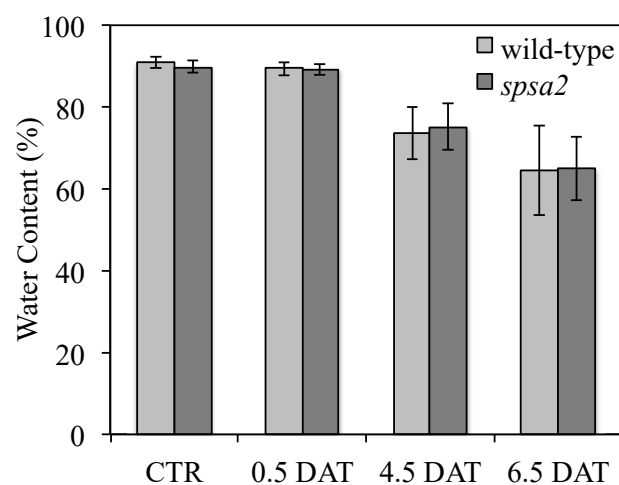

**Figure S5.** Relative water content in wild-type and *sp5a2* plants measured under control and stress conditions. Plants were harvested at 12 h light. A minimum of 20 plants were collected for each genotype and for each experimental point. Values are reported as means  $\pm$  SDs. A t-test was performed, and no significant statistical differences were observed.

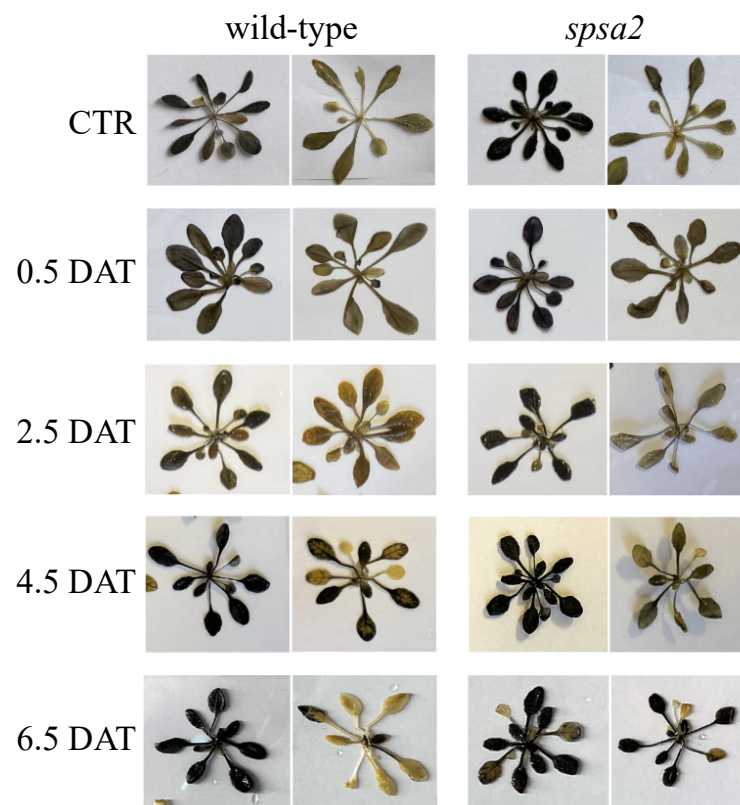

**Figure S6.** Starch content in wild-type and *spsa2* was evaluated with Lugol staining. Plants were collected at 12 h light. For clarity, two stained plants for each genotype, and experimental data are reported. Plants were chosen to represent the typical range of colors observed.

**Table S1.** List of primers.

|                               | Left primer                   | Right primer                  |
|-------------------------------|-------------------------------|-------------------------------|
| <i>LBb1.3</i>                 |                               | 5'-ATTTGCCGATTTTCGGAAC-3'     |
| <sup>1</sup> <i>SPSA2</i> -LP |                               | 5'-CCAGCTACTCTGAACCGTCTG-3'   |
| <sup>1</sup> <i>SPSA2</i> -RP | 5'-TGCAAGACTTCAAGGTTTCGC-3'   |                               |
| <sup>2</sup> <i>SPSA2</i>     | 5'-GCAAGAGCGAGAATCATAGGCT-3'  | 5'-CCAGCTACTCTGAACCGTCTG-3'   |
| <sup>3</sup> <i>SPSA2</i>     | 5'-AGTGAAAGATCCCGCTTTGA-3'    | 5'-ACCTAAGGGCCTGAGATCGT-3'    |
| <i>ACT</i>                    | 5'-AACTCTCCCGCTATGTATGTCGC-3' | 5'-CAATACCGGTTGTACGACCACTG-3' |
| <i>PP2A</i>                   | 5'-GTAGGACCGAGCCAACTA-3'      | 5'-CATCCTTACCCAAGACTGGA-3'    |
| <i>G6PD1</i><br>(At1g09420)   | 5'-GCAGCATGGGATCTATTAC-3'     | 5'-ACCAACAGGACCTCTGCTTC-3'    |
| <i>G6PD2</i><br>(At1g24280)   | 5'-AAGTGACGAGCTTGATGCAG-3'    | 5'-ACCACGGCTACCATAAGGAT-3'    |
| <i>G6PD3</i><br>(At3g27300)   | 5'-GCTTTCACTCCATTGCTCA-3'     | 5'-TAGATAATGGGCACCGACTG-3'    |
| <i>G6PD4</i><br>(At5g13110)   | 5'-TTGCTGAAGAACTAGAGCTG-3'    | 5'-TGATGCAATGATGGATCTGAG-3'   |
| <i>G6PD5</i><br>(At5g35790)   | 5'-GACACAATCAGAGGCGACCA-3'    | 5'-TAGCTGATCTGCTTCCGCTG-3'    |
| <i>G6PD6</i><br>(At5g40760)   | 5'-TGGGAGAAAATGACGGAAGC-3'    | 5'-TCAACGTGCCATTGACCAGA-3'    |

<sup>1</sup>*SPSA2*, pair of primers used in the selection of homozygous *spsa2* plants;

<sup>2</sup>*SPSA2*, pair of primers used in the detection of the residual expression level of *SPSA2* in homozygous line;

<sup>3</sup>*SPSA2*, pair of primers used in the detection of the expression level of *SPSA2* in wild-type plants in response to drought. Primers were as in [15].
